# Supplementary material for: The Assessment of Reasoning Tool (ART): structuring the conversation between teachers and learners
Source: publisher site journal article supplement (doi:10.1515/dx-2018-0052), 2018-11-08
Supplement: Supplementary file 1 [file Evaluation of ART.docx]

**ASSESSMENT OF REASONING TOOL (ART)**

**Evaluation Form**

The ART has been created for clinical teachers to facilitate assessment and performance feedback of learners on their diagnostic reasoning skills.

Please rate the quality of the attached ART on the following characteristics:

Poor Good

1 2 3 4 5

1. Relevant to my practice
2. Covers important domains of clinical reasoning
3. Provides structure for assessment
4. Provides structure for performance feedback
5. Easy to use
6. Promote learning about clinical reasoning

Please list any additional aspects of clinical reasoning that you think should be added to the tool _________________________________________________________________________

Please provide additional comments about ways to improve the tool (e.g. clarity, verbiage, format, etc.)

______________________________­­­___________________________________________
